# Supplementary material
Source: ML conference proceedings conference paper supplement (https://aclanthology.org/2020.blackboxnlp-1.10)
Supplement: OptionalSupplementaryMaterial [file 2020.blackboxnlp-1.10.OptionalSupplementaryMaterial.zip]

## A Sparse attention

A natural way to get a sparse attention distribution is by using the **sparsemax transformation** (Martins and Astudillo, 2016), which computes an Euclidean projection of the score vector onto the probability simplex  $\Delta^n := \{\mathbf{p} \in \mathbb{R}^n \mid \mathbf{p} \geq \mathbf{0}, \mathbf{1}^\top \mathbf{p} = 1\}$ , or, more generally, the  $\alpha$ -**entmax transformation** (Peters et al., 2019):

$$\alpha\text{-entmax}(\mathbf{s}) := \arg \max_{\mathbf{p} \in \Delta^n} \mathbf{p}^\top \mathbf{s} + H_\alpha(\mathbf{p}), \quad (2)$$

where  $H_\alpha$  is a generalization of the Shannon and Gini entropies proposed by Tsallis (1988), parametrized by a scalar  $\alpha \geq 1$ :

$$H_\alpha(\mathbf{p}) := \begin{cases} \frac{1}{\alpha(\alpha-1)} \sum_j (p_j - p_j^\alpha), & \alpha \neq 1 \\ -\sum_j p_j \log p_j, & \alpha = 1. \end{cases} \quad (3)$$

Setting  $\alpha = 1$  recovers the softmax function, while for any value of  $\alpha > 1$  this transformation can return a sparse probability vector. Letting  $\alpha = 2$ , we recover sparsemax. A popular choice is  $\alpha = 1.5$ , which has been successfully used in machine translation and morphological inflection applications (Peters et al., 2019).

## B Data statistics and preparation

We used four datasets for text classification: SST,<sup>7</sup> IMDB,<sup>8</sup> AgNews,<sup>9</sup> and Yelp.<sup>10</sup> One dataset for NLI: SNLI,<sup>11</sup> along with its extended version (eSNLI<sup>12</sup>) which includes human-annotated explanations of the entailment relations (Camburu et al., 2018). And the EN→DE IWSLT 2017 dataset for machine translation (Cettolo et al., 2017).<sup>13</sup> Table 5 shows statistics for each dataset.

| NAME   | # TRAIN | # TEST | AVG. TOKENS | # CLASSES |
|--------|---------|--------|-------------|-----------|
| SST    | 6920    | 1821   | 19          | 2         |
| IMDB   | 25K     | 25K    | 280         | 2         |
| AgNews | 115K    | 20K    | 38          | 2         |
| Yelp   | 5.6M    | 1M     | 130         | 5         |
| SNLI   | 549K    | 9824   | 14 / 8      | 3         |
| IWSLT  | 206K    | 2271   | 20 / 18     | 134,086   |

Table 5: Dataset statistics. The average number of tokens for SNLI is related to the premise and hypothesis, and for IWSLT to the source and target sentences.

For AgNews, we considered the binary case of World vs Business articles. Although the selected datasets are the same as in previous works (Jain and Wallace, 2019; Wiegrefe and Pinter, 2019), the training and test set might differ. For SST, IMDB, IWSLT and SNLI we used the standard splits, but for AgNews and Yelp we randomly split the dataset, leaving 85% for training and 15% for test. Moreover, for IMDB, AgNews and Yelp we randomly selected 10%, 15% and 15% of examples from the training set to be used as validation data, respectively.

## C Computing infrastructure

Our infrastructure consists of 4 machines with the specifications shown in Table 6. The machines were used interchangeably, and all experiments were executed in a single GPU. Despite having machines with different specifications, we did not observe large differences in the execution time of our models across different machines.

<sup>7</sup><https://nlp.stanford.edu/sentiment/>

<sup>8</sup><https://ai.stanford.edu/~amaas/data/sentiment/>

<sup>9</sup>[https://www.di.unipi.it/~gulli/AG\\_corpus\\_of\\_news\\_articles.html](https://www.di.unipi.it/~gulli/AG_corpus_of_news_articles.html)

<sup>10</sup><https://www.yelp.com/dataset/>

<sup>11</sup><https://nlp.stanford.edu/projects/snli/>

<sup>12</sup><https://github.com/OanaMariaCamburu/e-SNLI>

<sup>13</sup><https://wit3.fbk.eu/mt.php?release=2017-01-trnted>

| #  | GPU                    | CPU                                    |
|----|------------------------|----------------------------------------|
| 1. | 4 × Titan Xp - 12GB    | 16 × AMD Ryzen 1950X @ 3.40GHz - 128GB |
| 2. | 4 × GTX 1080 Ti - 12GB | 8 × Intel i7-9800X @ 3.80GHz - 128GB   |
| 3. | 3 × RTX 2080 Ti - 12GB | 12 × AMD Ryzen 2920X @ 3.50GHz - 128GB |
| 4. | 3 × RTX 2080 Ti - 12GB | 12 × AMD Ryzen 2920X @ 3.50GHz - 128GB |

Table 6: Computing infrastructure.

## D Classifiers experimental setup (Table 2)

We chose our classifiers so that they are close to the models used by related works (Jain and Wallace, 2019; Wiegrefe and Pinter, 2019; Bastings et al., 2019). For all models, we calculated their accuracy on the dev set after each epoch. At the end of training we selected the model with the best validation accuracy. We experimented with two classes of classifiers: a simple RNN with attention as in Jain and Wallace (2019); Wiegrefe and Pinter (2019); and the rationalizer models of Lei et al. (2016) and Bastings et al. (2019) which sample binary masks from Bernoulli and HardKuma distributions, respectively.

### D.1 RNNs with attention

For the text classification experiments, each input word  $x_i$  is mapped to 300D-pretrained GloVe embeddings (Pennington et al., 2014) from the 840B release,<sup>14</sup> kept frozen, followed by a bidirectional LSTM layer (BiLSTM) resulting in vectors  $\mathbf{h}_1, \dots, \mathbf{h}_n$ . We score each of these vectors using the additive formulation of Bahdanau et al. (2015), applying an attention transformation to convert the resulting scores  $\mathbf{s} \in \mathbb{R}^n$  to a probability distribution  $\pi \in \Delta^n$ . We use this to compute a contextual vector  $\mathbf{c} = \sum_{i=1}^n \pi_i \mathbf{h}_i$ , which is fed into the output softmax layer that predicts  $\hat{y}$ . For NLI, the input  $x$  is a pair of sentences (a premise and an hypothesis), and the classifier  $C$  is similar to the the above, but with two independent BiLSTM layers, one for each sentence. In the attention layer, we use the last hidden state of the hypothesis as the query and the premise vectors as keys.

We used the AdamW (Loshchilov and Hutter, 2019) optimizer for all experiments. We tuned two hyperparameters: learning rate within  $\{0.003, \mathbf{0.001}, 0.0001\}$ , and  $\ell_2$  regularization within  $\{0.01, 0.001, \mathbf{0.0001}, 0\}$ . We picked the best configuration by doing a grid search and by taking into consideration the accuracy on the validation set (selected values in bold). Table 7 shows all hyperparameters set for training.

| HYPERPARAM.             | SST    | IMDB   | AGNews | YELP   | SNLI   |
|-------------------------|--------|--------|--------|--------|--------|
| Word embeddings size    | 300    | 300    | 300    | 300    | 300    |
| BiLSTM hidden size      | 128    | 128    | 128    | 128    | 128    |
| Merge BiLSTM states     | concat | concat | concat | concat | concat |
| Batch size              | 8      | 16     | 16     | 128    | 32     |
| Number of epochs        | 10     | 10     | 5      | 5      | 10     |
| Early stopping patience | 5      | 5      | 3      | 3      | 5      |
| Learning rate           | 0.001  | 0.001  | 0.001  | 0.001  | 0.001  |
| $\ell_2$ regularization | 0.0001 | 0.0001 | 0.0001 | 0.0001 | 0.0001 |

Table 7: RNNs training hyperparameters for text classification and NLI datasets.

### D.2 Bernoulli and HardKuma

We used the implementation of Bastings et al. (2019),<sup>15</sup> which includes a reimplementaion of the generator-encoder model from (Lei et al., 2016). The model used for text classification is a RNN-based generator followed by a RNN-based encoder, whereas for NLI is a decomposable attention classifier from (Parikh et al., 2016), for which only the HardKuma implementation was available. In order to faithfully compare the frameworks, we adapted the HardKuma code and implemented a Bernoulli version of the

<sup>14</sup><http://nlp.stanford.edu/data/glove.840B.300d.zip>

<sup>15</sup>[https://github.com/bastings/interpretable\\_predictions](https://github.com/bastings/interpretable_predictions)

same classifier, taking into consideration the sparsity and fused-lasso loss penalties, and the deterministic strategy used during test time. For simplicity, we used the independent variant of the generator of [Lei et al. \(2016\)](#). Table 8 lists only the hyperparameters that we set during training. We refer to the original work of [Bastings et al. \(2019\)](#) to see all other hyperparameters, for which we kept the default values.

| HYPERPARAM.                  | SST       | IMDB      | AGNews    | YELP      | SNLI      |
|------------------------------|-----------|-----------|-----------|-----------|-----------|
| Latent selection (HardKuma)  | 0.3       | 0.1       | 0.3       | 0.3       | 0.1       |
| Sparsity penalty (Bernoulli) | 0.01      | 0.001     | 0.01      | 0.01      | 0.0003    |
| Lasso penalty                | 0         | 0         | 0         | 0         | 0         |
| Batch size                   | 25        | 25        | 25        | 256       | 64        |
| Number of epochs             | 25        | 25        | 25        | 10        | 100       |
| Early stopping patience      | 5         | 5         | 5         | 5         | 100       |
| Learning rate                | 0.0002    | 0.0002    | 0.0002    | 0.001     | 0.0002    |
| $\ell_2$ regularization      | $10^{-5}$ | $10^{-5}$ | $10^{-5}$ | $10^{-5}$ | $10^{-6}$ |

Table 8: Rationalizer models training hyperparameters for text classification and NLI datasets.

### D.3 Validation set results and model statistics

Table 9 shows the accuracy of each classifier on the validation set, their number of trainable parameters and the average training time per epoch.

| CLF.              | SST  |     |       | IMDB |     |       | AGNews |     |       |
|-------------------|------|-----|-------|------|-----|-------|--------|-----|-------|
|                   | # P  | $t$ | ACC   | # P  | $t$ | ACC   | # P    | $t$ | ACC   |
| $C$               | 474K | 10s | 85.32 | 474K | 2m  | 95.64 | 474K   | 2m  | 98.09 |
| $C_{\text{ent}}$  | 474K | 10s | 84.29 | 474K | 2m  | 95.84 | 474K   | 2m  | 98.54 |
| $C_{\text{sp}}$   | 474K | 10s | 84.17 | 474K | 2m  | 95.44 | 474K   | 2m  | 98.51 |
| $C_{\text{bern}}$ | 1.1M | 15s | 80.16 | 1.1M | 2m  | 87.40 | 1.1M   | 2m  | 96.26 |
| $C_{\text{hk}}$   | 1.1M | 15s | 84.40 | 1.1M | 2m  | 91.84 | 1.1M   | 2m  | 96.74 |

Table 9: Classifier results on the validation set and model statistics. # P is the number of trainable parameters, and is  $t$  the average training time per epoch.

| CLF.              | YELP |     |       | SNLI |     |       |
|-------------------|------|-----|-------|------|-----|-------|
|                   | # P  | $t$ | ACC   | # P  | $t$ | ACC   |
| $C$               | 474K | 3h  | 77.03 | 998K | 4m  | 78.74 |
| $C_{\text{ent}}$  | 474K | 3h  | 76.72 | 998K | 4m  | 79.38 |
| $C_{\text{sp}}$   | 474K | 3h  | 76.84 | 998K | 4m  | 79.69 |
| $C_{\text{bern}}$ | 1.1M | 5h  | 69.99 | 382K | 2m  | 79.79 |
| $C_{\text{hk}}$   | 1.1M | 5h  | 74.29 | 462K | 2m  | 86.04 |

Table 10: Continuation of Table 9.

## E Communication experimental setup (Table 3)

Training the communication under our framework consists on training a layperson  $L$  on top of explanations (message) produced by  $E$  about  $C$ 's decision. With the exception of the explainer  $E$  trained jointly with  $L$ , none of the other explainers have trainable parameters. Therefore, in these cases, the communication between  $E$  and  $L$  consists only on training  $L$ . For all models, we calculated its CSR on the dev set after each epoch. At the end of training we selected the model with the best validation CSR. Table 11 shows the communication hyperparameters. Note that for SNLI we still need to train a BiLSTM to encode the hypothesis.

| HYPERPARAM.             | SST       | IMDB      | AGNews    | YELP      | SNLI      |
|-------------------------|-----------|-----------|-----------|-----------|-----------|
| Word embeddings size    | -         | -         | -         | -         | 300       |
| BiLSTM hidden size      | -         | -         | -         | -         | 128       |
| Merge BiLSTM states     | -         | -         | -         | -         | concat    |
| Batch size              | 16        | 16        | 16        | 112       | 64        |
| Number of epochs        | 10        | 10        | 10        | 5         | 10        |
| Early stopping patience | 3         | 3         | 3         | 3         | 3         |
| Learning rate           | 0.001     | 0.001     | 0.001     | 0.003     | 0.001     |
| $\ell_2$ regularization | $10^{-5}$ | $10^{-5}$ | $10^{-5}$ | $10^{-5}$ | $10^{-5}$ |

Table 11: Communication hyperparameters for text classification and NLI datasets.

## E.1 Validation set results and model statistics

Table 12 shows the CSR and  $ACC_L$  for each explainer on the validation set, the number of trainable parameters of  $L$  and the average training time per epoch.

| EXPLAINER           | SST |     |       |         | IMDB |     |       |         | AGNews |     |       |         |
|---------------------|-----|-----|-------|---------|------|-----|-------|---------|--------|-----|-------|---------|
|                     | # P | $t$ | CSR   | $ACC_L$ | # P  | $t$ | CSR   | $ACC_L$ | # P    | $t$ | CSR   | $ACC_L$ |
| Random              | 38K | 10s | 63.76 | 62.84   | 247K | 1m  | 61.36 | 61.24   | 120K   | 2m  | 85.26 | 84.58   |
| Erasure             | 38K | 10s | 81.88 | 79.82   | 247K | 2m  | 94.00 | 91.40   | 120K   | 3m  | 98.41 | 96.98   |
| Top- $k$ gradient   | 38K | 10s | 76.72 | 75.57   | 247K | 1m  | 91.88 | 89.52   | 120K   | 2m  | 98.23 | 96.97   |
| Top- $k$ softmax    | 38K | 20s | 84.29 | 80.62   | 247K | 1m  | 96.60 | 93.60   | 120K   | 2m  | 98.54 | 97.14   |
| Top- $k$ 1.5-entmax | 38K | 20s | 85.44 | 80.28   | 247K | 1m  | 97.88 | 94.92   | 120K   | 2m  | 98.22 | 97.37   |
| Top- $k$ sparsemax  | 38K | 20s | 85.44 | 81.54   | 247K | 1m  | 96.76 | 93.32   | 120K   | 2m  | 96.46 | 95.72   |
| Select. 1.5-entmax  | 38K | 10s | 85.55 | 80.62   | 247K | 1m  | 97.44 | 94.56   | 120K   | 1m  | 98.30 | 97.41   |
| Select. sparsemax   | 38K | 10s | 85.44 | 81.54   | 247K | 1m  | 97.04 | 93.36   | 120K   | 1m  | 96.46 | 95.72   |
| Bernoulli           | 38K | 5s  | 84.75 | 78.21   | 247K | 1m  | 91.80 | 87.36   | 120K   | 1m  | 97.12 | 94.82   |
| HardKuma            | 38K | 5s  | 87.50 | 81.76   | 247K | 1m  | 95.36 | 91.20   | 120K   | 1m  | 97.38 | 96.05   |

Table 12: Communication results on the validation set and explainer statistics. # P is the number of trainable parameters, and is  $t$  the average training time per epoch.

| EXPLAINER           | YELP |     |       |         | SNLI |     |       |         |
|---------------------|------|-----|-------|---------|------|-----|-------|---------|
|                     | # P  | $t$ | CSR   | $ACC_L$ | # P  | $t$ | CSR   | $ACC_L$ |
| Random              | 1.8M | 3h  | 52.55 | 48.21   | 560K | 9m  | 31.04 | 33.11   |
| Erasure             | 1.8M | 4h  | 79.63 | 69.59   | 560K | 10m | 78.72 | 70.60   |
| Top- $k$ gradient   | 1.8M | 3h  | 71.81 | 63.59   | 560K | 10m | 77.55 | 69.41   |
| Top- $k$ softmax    | 1.8M | 3h  | 81.49 | 70.67   | 560K | 9m  | 79.10 | 70.95   |
| Top- $k$ 1.5-entmax | 1.8M | 3h  | 82.80 | 71.31   | 560K | 9m  | 80.30 | 73.57   |
| Top- $k$ sparsemax  | 1.8M | 3h  | 82.97 | 71.46   | 560K | 9m  | 83.25 | 75.34   |
| Select. 1.5-entmax  | 1.8M | 2h  | 82.90 | 70.99   | 560K | 6m  | 77.46 | 71.66   |
| Select. sparsemax   | 1.8M | 2h  | 84.67 | 72.25   | 560K | 6m  | 82.33 | 75.11   |
| Bernoulli           | 1.8M | 2h  | 84.93 | 66.77   | 560K | 2m  | 75.75 | 68.61   |
| HardKuma            | 1.8M | 2h  | 87.43 | 71.57   | 560K | 3m  | 75.10 | 71.10   |

Table 13: Continuation of Table 12.

## F Joint $E$ and $L$ setup

### F.1 Communication

According to §4.2, in this model we have two set of parameters to train, one for the explainer  $E$  and other for the layperson  $L$ , whereas the classifier is a frozen model that we want to explain. Here, we set  $C$  as the RNN with softmax classifier (see §2). We design  $E$  with the same architecture of the RNNs with attention from §D.1 but without a final output layer, and  $L$  have the same architecture as the laypersons in §5. In short, the architecture of  $E$  is composed of: (i) embedding layer; (ii) BiLSTM; (iii) attention mechanism. As before, the message is constructed with the words extracted from the attention mechanism.

We use sparsemax attention during training to ensure end-to-end differentiability, and we recover the top- $k$  attended words during test time. We used  $k = 5$  for IMDB and  $k = 4$  for SNLI in all experiments. In order to encourage faithful explanations, we set  $h = \frac{1}{L} \sum_i C_{\text{RNN}}(x_i)$  and  $\tilde{h} = \frac{1}{L} \sum_i \text{FFN}(E_{\text{RNN}}(x_i))$ , where FFN is a simple feed-forward layer, and  $C_{\text{RNN}}(x_i)$  and  $E_{\text{RNN}}(x_i)$  are the BiLSTM states from the classifier and the explainer, respectively. In other words, we are approximating the average of the BiLSTM states of  $C$  and  $E$ . We set  $\lambda = 1$  and  $\beta = 0.2$  and used the same hyperparameters as in Table 11. The list of stopwords used in our experiments contains 127 English words extracted from NLTK.

## F.2 Analysis of $\beta$

A potential problem of this model is for the two agents to agree on a trivial protocol, ensuring a high CSR even with bad quality explanations (e.g. punctuations or stopwords). Besides preventing stopwords to be in the message,<sup>16</sup> we set a different probability  $\beta$  of the explainer accessing the predictions of the classifier  $\hat{y}$ . Intuitively, these strategies should encourage explanations to have higher quality. One way to quantitatively access the quality of the explanations is by aggregating the relative frequencies of each selected word in the validation set, and calculating its Shannon’s entropy. If the entropy is low, then the explanations have a high number of repetitions and the explainers are focusing on a very small subset of words, denoting a trivial protocol. To check for a reasonable entropy score that resembles a good quality explanation, we investigate the entropy of the other explainers, for which we had confirmed their quality via human evaluation.

In order to see the impact of  $\beta$ , we carried an experiment with increasing values of  $\beta$  and looked at the CSR,  $\text{ACC}_L$  and the entropy ( $H$ ) of the generated explanations. Results are shown in Table 14 for each explainer on IMDB and SNLI.

| CLF.              | EXPLAINER                           | IMDB  |       |                | SNLI |       |                |
|-------------------|-------------------------------------|-------|-------|----------------|------|-------|----------------|
|                   |                                     | $H$   | CSR   | $\text{ACC}_L$ | $H$  | CSR   | $\text{ACC}_L$ |
| $C$               | Random                              | 9.13  | 59.20 | 58.92          | 8.21 | 31.04 | 33.11          |
| $C$               | Erasure                             | 9.40  | 96.32 | 93.48          | 9.75 | 78.72 | 70.60          |
| $C$               | Top- $k$ gradient                   | 9.49  | 85.84 | 83.72          | 9.39 | 77.55 | 69.41          |
| $C$               | Top- $k$ softmax                    | 9.38  | 94.44 | 91.84          | 9.76 | 78.66 | 71.00          |
| $C_{\text{ent}}$  | Top- $k$ 1.5-entmax                 | 9.62  | 95.20 | 93.36          | 9.54 | 80.30 | 73.57          |
| $C_{\text{sp}}$   | Top- $k$ sparsemax                  | 9.56  | 95.28 | 92.56          | 8.79 | 83.25 | 75.34          |
| $C_{\text{ent}}$  | Select. 1.5-entmax                  | 10.76 | 97.44 | 94.56          | 8.49 | 77.46 | 71.66          |
| $C_{\text{sp}}$   | Selec. sparsemax                    | 10.41 | 97.04 | 93.36          | 8.38 | 82.33 | 75.11          |
| $C_{\text{bern}}$ | Bernoulli                           | 10.66 | 91.88 | 87.36          | 8.27 | 75.75 | 68.61          |
| $C_{\text{hk}}$   | HardKuma                            | 11.38 | 95.36 | 91.20          | 9.93 | 75.10 | 71.10          |
| -                 | Human highlights                    | -     | -     | -              | 8.72 | 87.97 | 87.97          |
| $C$               | Joint $E$ and $L$ ( $\beta = 0.0$ ) | 6.16  | 93.04 | 90.84          | 9.81 | 80.74 | 72.38          |
| $C$               | Joint $E$ and $L$ ( $\beta = 0.2$ ) | 6.05  | 98.52 | 94.56          | 9.81 | 93.44 | 77.20          |
| $C$               | Joint $E$ and $L$ ( $\beta = 0.5$ ) | 5.63  | 99.68 | 95.64          | 9.45 | 95.81 | 77.54          |
| $C$               | Joint $E$ and $L$ ( $\beta = 1.0$ ) | 3.72  | 99.92 | 95.56          | 9.01 | 97.49 | 77.23          |

Table 14: Entropy of the explanations for all explainers on the validation set of IMDB and SNLI. Entropy for human highlights was calculated based on non-neutral examples.

When  $\beta = 0$  no information about the label predicted by the classifier is being exposed to the explainer, and as a result we have a model that resembles a combination of selective (during training) and top- $k$  (during test time) sparsemax explainers. This means that the results between these explainers are expected to be very similar in terms of CSR.<sup>17</sup> Overall, for both datasets, we can see a tradeoff between CSR and entropy  $H$  as  $\beta$  increases, suggesting that CSR is not able to capture the notion of quality (which was expected due to the subjective nature of an explanation). For IMDB the entropy values were lower than our previous explainers, but for SNLI they were very similar. A potential reason for this is the particularity of the two datasets: IMDB have long documents (280 words on average) with a large set of repetitive words which are not stopwords and are strongly correlated with the labels (e.g. good, ok, bad, etc.); SNLI

<sup>16</sup>In practice, we simply set attention scores associated with stopwords to  $-\infty$ .

<sup>17</sup>Note that this also depends on the performance of  $C$  and  $C_{\text{sp}}$ , which are indeed very similar in this case: 95.64 and 95.44.

premises are very short (14 words on average) without a large set of repetitive words. Finally, due to this tradeoff, we selected  $\beta = 0.2$  for all of our experiments since it induces a very high CSR with a reasonably good entropy.

## G Machine Translation experiments

### G.1 Data

To compare explainers on a more challenging task with large  $|\mathcal{Y}|$ , we ran an experiment on neural machine translation (NMT), adapting the JoeyNMT framework (Kreutzer et al., 2019). We used the EN→DE IWSLT 2017 dataset (Cettolo et al., 2017), with the standard splits (Table 5).

### G.2 Classifier

We replicated the work of Peters et al. (2019) with the exception that we used raw words as input instead of byte-pair encodings. The implementation is based on Joey-NMT (Kreutzer et al., 2019). We employed beam search decoding with beam size of 5, achieving a BLEU score of 20.49, 21.12 and 20.75 for softmax ( $C$ ), 1.5-entmax ( $C_{\text{ent}}$ ) and sparsemax ( $C_{\text{sp}}$ ), respectively. We refer to the work of Peters et al. (2019) for more training details. Table 15 shows the classifier hyperparameters.

| HYPERPARAM.             | VALUE                   |
|-------------------------|-------------------------|
| Word embeddings size    | 512                     |
| BiRNN hidden size       | 512                     |
| Attention scorer        | (Bahdanau et al., 2015) |
| Batch size              | 32                      |
| Optimizer               | Adam                    |
| Number of epochs        | 100                     |
| Early stopping patience | 8                       |
| Learning rate           | 0.001                   |
| Decrease factor         | 0.5                     |
| $\ell_2$ regularization | 0                       |
| RNN type                | LSTM                    |
| RNN layers              | 2                       |
| Dropout                 | 0.3                     |
| Hidden dropout          | 0.3                     |
| Maximum output length   | 100                     |
| Beam size               | 5                       |

Table 15: Classifier hyperparameters for neural machine translation.

### G.3 Communication

We consider the decision taken by the NMT system when generating the  $t^{\text{th}}$  target word ( $y$ ), given the source sentence  $x$  and the previously generated words  $y_{1:t-1}$ . Note that in this example  $\mathcal{Y}$  is the entire target vocabulary. The message is the concatenation of  $k$  source words (ranked by importance, without any word order information) with the prefix  $y_{1:t-1}$ . The layperson must predict the target word given this limited information (see Fig. 3).

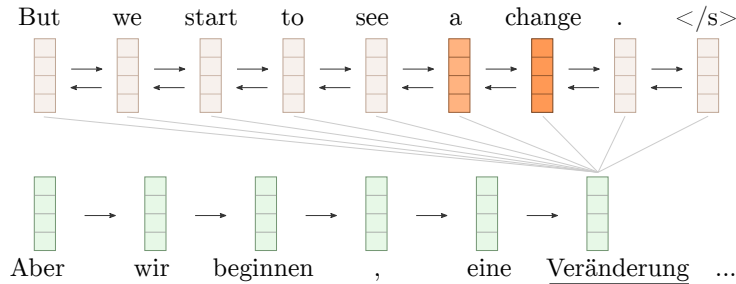

Figure 3: Example of sparse attention for machine translation. When the model is generating the word “Veränderung”, the source words “a” and “change” are treated as explanation and sent as message.

The layperson is a model that uses an unidirectional LSTM with 256 hidden units to encode the translation prefix, and a feed-forward layer to encode the concatenation of  $k$  source word embeddings (the message) to a vector of 256 dimensions. The two vectors are concatenated and passed to a linear output layer to predict the next word  $\tilde{y} \in \mathcal{Y}$  from the target vocabulary. We used 300D-pretrained GloVe embeddings to encode source words (EN), and 300D-pretrained FastText embeddings to encode target words (DE).<sup>18</sup> Table 16 shows the communication hyperparameters.

| HYPERPARAM.             | VALUE     |
|-------------------------|-----------|
| Word embeddings size    | 300       |
| LSTM hidden size        | 256       |
| Merge LSTM states       | concat    |
| Batch size              | 16        |
| Number of epochs        | 10        |
| Early stopping patience | 5         |
| Learning rate           | 0.003     |
| $\ell_2$ regularization | $10^{-5}$ |

Table 16: Communication hyperparameters for neural machine translation.

#### G.4 Results

Results comparing different filtering methods varying  $k$  are shown in Table 17. We show the CSR as we varied  $k \in \{0, 1, 3, 5\}$ . There are two main findings. First, we see again that **top- $k$  attention outperforms top- $k$  gradient**, in this case with a wider margin. Second, we see that all methods perform better as we increase  $k$ , albeit we can see a performance degradation of attention-based explainers for  $k = 5$ . An interesting case is when  $k = 0$ , meaning that  $L$  has no access to the source sentence, behaving like an unconditioned language model. In this case the performance is much worse, indicating that both explainers are selecting relevant tokens when  $k > 0$ . As we found for IMDB and SNLI, as we increased  $k$  we observed a trade-off between  $k$  and CSR for IWSLT. Fig. 4 depicts this finding.

| CLF.             | EXPLAINER           | $k = 0$      | $k = 1$      | $k = 3$      | $k = 5$      |
|------------------|---------------------|--------------|--------------|--------------|--------------|
| $C$              | Top- $k$ gradient   | 21.99        | 35.21        | 38.33        | 40.30        |
| $C$              | Top- $k$ softmax    | 21.99        | <b>62.58</b> | 62.82        | 62.64        |
| $C_{\text{ent}}$ | Top- $k$ 1.5-entmax | <b>22.31</b> | 62.53        | <b>63.48</b> | <b>62.69</b> |
| $C_{\text{sp}}$  | Top- $k$ sparsemax  | 22.14        | 62.21        | 61.94        | 61.92        |

Table 17: Results for IWSLT. Reported are CSR scores.

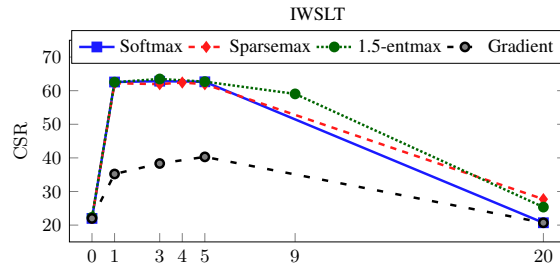

Figure 4: Message sparsity analysis for IWSLT. For SNLI,  $k = 0$  corresponds to a case where the layperson only sees the translation prefix. The rightmost entry is the average length of the examples in the test set, and therefore it represents an explainer that simply pass forward all words to the layperson (i.e. a full bag-of-words). The average  $k$  for sparsemax and 1.5-entmax are, respectively: 4.5 and 9.4.

<sup>18</sup><https://dl.fbaipublicfiles.com/fasttext/vectors-crawl/cc.de.300.bin.gz>



## H Human annotation

We had four different human annotators, two for IMDB and two for SNLI. No information was given about the explainers which produced each message, and documents were presented in random order. Since in our experiments we define the message as being a bag-of-words, which does not encode order information, the explanations (i.e. the selected words) were shuffled and displayed as a cloud of words. The annotators were asked to predict the label of each document, when seeing only these explanations. For SNLI, we show the entire hypothesis as raw text and the premise as a cloud of words. We selected top- $k$  explainers with  $k = 5$  for IMDB and  $k = 4$  for SNLI. Figure 5 shows a snapshot of the annotation interface used for the experiments described in §6.

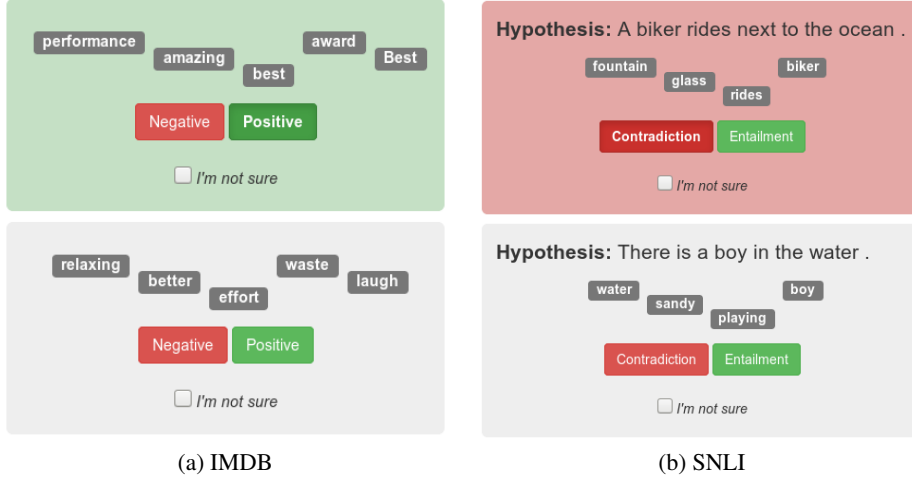

Figure 5: Snapshot of the annotation interface.

By directly looking at the explanations, we observed that some of them are very ambiguous with respect to the true label, so we decided to include a checkbox to be marked in case the annotator was not sure by his/her decision. The unsure checkbox also helps to capture the notion of sufficiency, that is, if the explanations are sufficient for a human predict some label. A similar approach was employed by Yu et al. (2019) using a two-stage annotation method, explicitly asking the human annotator if the rationale was sufficient for his/her decision. Furthermore, we calculated the agreement between explainers using the Cohen’s kappa coefficient and the relative observed agreement ratio (or accuracy,  $p_o$ ). Table 18 shows statistics for the unsure checkbox and agreement between annotators.

| CLF.           | EXPLAINER           | IMDB        |             |             |         |         | SNLI        |             |             |         |         |
|----------------|---------------------|-------------|-------------|-------------|---------|---------|-------------|-------------|-------------|---------|---------|
|                |                     | $u$         | $p_o$       | $\kappa$    | $CSR_H$ | $ACC_H$ | $u$         | $p_o$       | $\kappa$    | $CSR_H$ | $ACC_H$ |
| $C$            | Erasure             | 0.05        | 0.92        | 0.83        | 89.25   | 86.25   | 0.25        | 0.83        | 0.66        | 72.50   | 83.50   |
| $C$            | Top- $k$ gradient   | 0.17        | 0.76        | 0.51        | 73.50   | 73.00   | 0.32        | 0.80        | 0.59        | 65.75   | 76.75   |
| $C$            | Top- $k$ softmax    | 0.23        | 0.91        | 0.81        | 89.25   | 88.25   | 0.25        | 0.78        | 0.55        | 72.00   | 82.75   |
| $C_{ent}$      | Top- $k$ 1.5-entmax | 0.09        | 0.91        | 0.81        | 89.25   | 85.75   | 0.29        | 0.82        | 0.64        | 70.00   | 80.50   |
| $C_{sp}$       | Top- $k$ sparsemax  | 0.09        | 0.88        | 0.76        | 89.00   | 87.50   | 0.38        | 0.80        | 0.59        | 68.25   | 80.25   |
| $C_{ent}$      | Selec. 1.5-entmax   | 0.13        | 0.80        | 0.60        | 86.50   | 84.00   | 0.21        | 0.84        | 0.67        | 75.25   | 87.00   |
| $C_{sp}$       | Selec. sparsemax    | 0.10        | 0.89        | 0.77        | 87.75   | 86.75   | 0.35        | 0.83        | 0.66        | 72.25   | 85.00   |
| $C_{bern}$     | Bernoulli           | 0.25        | 0.72        | 0.43        | 79.00   | 75.00   | 0.24        | 0.85        | 0.69        | 74.50   | 86.75   |
| $C_{hk}$       | HardKuma            | 0.17        | 0.81        | 0.61        | 83.75   | 80.75   | 0.18        | 0.86        | 0.72        | 79.25   | 87.50   |
| $C$            | Joint $E$ and $L$   | 0.12        | 0.96        | 0.91        | 96.75   | 89.25   | 0.65        | 0.71        | 0.44        | 58.00   | 70.00   |
| -              | Human highlights    | -           | -           | -           | -       | -       | 0.34        | 0.88        | 0.74        | 83.25   | 83.25   |
| <b>Average</b> |                     | <b>0.14</b> | <b>0.85</b> | <b>0.70</b> | -       | -       | <b>0.31</b> | <b>0.82</b> | <b>0.63</b> | -       | -       |

Table 18: Results for human evaluation.  $\kappa$  is the Cohen’s kappa coefficient,  $p_o$  is the relative observed agreement, and  $u$  represents the average of the portion of examples where annotators were unsure about their decisions.



## I Examples of explanations

Tables 19 and 20 show the average word overlap between explainers’ messages ( $m$ ) for IMDB and SNLI. Looking at the statistics we observed that, in general, top- $k$  attention-based classifiers produce similar explanations among themselves, and the erasure explainer produces messages similar to top- $k$  softmax. Major differences are observed for top- $k$  gradient and rationalizers, while selective attention produces, by definition, more words than top- $k$  attention (i.e.  $m_{\text{top-}k} \subseteq m_{\text{selective}}$ ). It is worth noticing that although explainers with similar messages are expected to have a similar CSR (e.g. top- $k$  attention and erasure), including/excluding a single word in the explanation might impact the layperson decision, as we can see in the next examples. Tables 21 and 22 show the output of erasure, gradient, attention, and joint explainers for IMDB, along with the prediction made by the classifier ( $y_C$ ) and the layperson ( $y_L$ ). In Tables 23 and 24 we also include the human highlights explainer for SNLI.

|                     | Erasure | Top- $k$<br>gradient | Top- $k$<br>softmax | Top- $k$<br>1.5-entmax | Top- $k$<br>sparsemax | Selec.<br>1.5-entmax | Selec.<br>sparsemax | Bernoulli | HardKuma | Joint $E$ and $L$ |
|---------------------|---------|----------------------|---------------------|------------------------|-----------------------|----------------------|---------------------|-----------|----------|-------------------|
| Erasure             | 1.00    | 0.34                 | 0.85                | 0.56                   | 0.55                  | 0.20                 | 0.37                | 0.14      | 0.23     | 0.20              |
| Top- $k$ gradient   | 0.34    | 1.00                 | 0.35                | 0.30                   | 0.30                  | 0.16                 | 0.26                | 0.11      | 0.18     | 0.11              |
| Top- $k$ softmax    | 0.85    | 0.35                 | 1.00                | 0.57                   | 0.55                  | 0.20                 | 0.37                | 0.14      | 0.24     | 0.20              |
| Top- $k$ 1.5-entmax | 0.56    | 0.30                 | 0.57                | 1.00                   | 0.61                  | 0.21                 | 0.39                | 0.12      | 0.24     | 0.19              |
| Top- $k$ sparsemax  | 0.55    | 0.30                 | 0.55                | 0.61                   | 1.00                  | 0.20                 | 0.43                | 0.13      | 0.24     | 0.20              |
| Selec. 1.5-entmax   | 0.20    | 0.16                 | 0.20                | 0.21                   | 0.20                  | 1.00                 | 0.45                | 0.24      | 0.44     | 0.08              |
| Selec. sparsemax    | 0.37    | 0.26                 | 0.37                | 0.39                   | 0.43                  | 0.45                 | 1.00                | 0.21      | 0.41     | 0.13              |
| Bernoulli           | 0.14    | 0.11                 | 0.14                | 0.12                   | 0.13                  | 0.24                 | 0.21                | 1.00      | 0.28     | 0.06              |
| HardKuma            | 0.23    | 0.18                 | 0.24                | 0.24                   | 0.24                  | 0.44                 | 0.41                | 0.28      | 1.00     | 0.08              |
| Joint $E$ and $L$   | 0.20    | 0.11                 | 0.20                | 0.19                   | 0.20                  | 0.08                 | 0.13                | 0.06      | 0.08     | 1.00              |

Table 19: Average word overlap (%) between explainers for IMDB.

|                     | Erasure | Top- $k$<br>gradient | Top- $k$<br>softmax | Top- $k$<br>1.5-entmax | Top- $k$<br>sparsemax | Selec.<br>1.5-entmax | Selec.<br>sparsemax | Bernoulli | HardKuma | Joint $E$ and $L$ |
|---------------------|---------|----------------------|---------------------|------------------------|-----------------------|----------------------|---------------------|-----------|----------|-------------------|
| Erasure             | 1.00    | 0.38                 | 0.77                | 0.55                   | 0.41                  | 0.35                 | 0.37                | 0.32      | 0.49     | 0.38              |
| Top- $k$ gradient   | 0.38    | 1.00                 | 0.40                | 0.36                   | 0.31                  | 0.34                 | 0.33                | 0.32      | 0.35     | 0.26              |
| Top- $k$ softmax    | 0.77    | 0.40                 | 1.00                | 0.56                   | 0.41                  | 0.36                 | 0.37                | 0.32      | 0.49     | 0.38              |
| Top- $k$ 1.5-entmax | 0.55    | 0.36                 | 0.56                | 1.00                   | 0.46                  | 0.36                 | 0.42                | 0.32      | 0.46     | 0.34              |
| Top- $k$ sparsemax  | 0.41    | 0.31                 | 0.41                | 0.46                   | 1.00                  | 0.35                 | 0.54                | 0.32      | 0.38     | 0.29              |
| Selec. 1.5-entmax   | 0.36    | 0.34                 | 0.36                | 0.36                   | 0.35                  | 1.00                 | 0.64                | 0.88      | 0.48     | 0.26              |
| Selec. sparsemax    | 0.37    | 0.33                 | 0.37                | 0.42                   | 0.54                  | 0.64                 | 1.00                | 0.60      | 0.45     | 0.26              |
| Bernoulli           | 0.32    | 0.32                 | 0.32                | 0.32                   | 0.32                  | 0.88                 | 0.60                | 1.00      | 0.46     | 0.24              |
| HardKuma            | 0.49    | 0.35                 | 0.49                | 0.46                   | 0.38                  | 0.48                 | 0.45                | 0.46      | 1.00     | 0.38              |
| Joint $E$ and $L$   | 0.38    | 0.26                 | 0.38                | 0.34                   | 0.29                  | 0.26                 | 0.26                | 0.24      | 0.38     | 1.00              |

Table 20: Average word overlap (%) between explainers for SNLI.

**(positive)** Mardi Gras : Made in china is an excellent movie that depicts how two cultures have much in common but , are not even aware of the influence each society has on one another . David Redmon open your eyes and allows you to see how the workers in china manufactures beads that cost little to nothing and are sold in America for up to 20 dollars . When Redmon questions Americans about where these beads come from they had no clue and seemed dumb founded . When he told them that they are made in China for less then nothing with horrible pay and unacceptable working conditions , Americans seemed sad , hurt , and a little remorseful but didn ' t really seem that they would stop purchasing the beads after finding out the truth . When Redmon questioned the workers in china they did not know that Americans were wearing them over their necks and paid so much for these beads . The workers laughed at what the purpose was behind beads and couldn ' t believe it . This movie is a great film that gives us something to think about in other countries besides our own . < br > < br > M . Pitts

| EXPLAINER           | $y_C$ | $y_L$ | EXPLANATION                                                                                                  |
|---------------------|-------|-------|--------------------------------------------------------------------------------------------------------------|
| Erasure             | pos   | pos   | excellent great film besides hurt                                                                            |
| Top- $k$ gradient   | pos   | neg   | hurt horrible a excellent couldn                                                                             |
| Top- $k$ softmax    | pos   | pos   | excellent great film movie besides                                                                           |
| Top- $k$ 1.5-entmax | pos   | pos   | great excellent couldn that besides                                                                          |
| Top- $k$ sparsemax  | pos   | pos   | excellent great couldn gives besides                                                                         |
| Select. entmax15    | pos   | pos   | great excellent couldn that besides hurt didn that horrible is china Pitts gives us Redmon stop is not for t |
| Select. sparsemax   | pos   | pos   | excellent great couldn gives besides china hurt that is                                                      |
| Bernoulli           | pos   | neg   | an excellent movie another dumb horrible unacceptable sad remorseful movie great br br Pitts                 |
| HardKuma            | pos   | pos   | excellent movie depicts America dumb horrible a great gives us besides our Pitts                             |
| Joint $E$ and $L$   | pos   | pos   | great excellent                                                                                              |

**(negative)** I don ' t remember " Barnaby Jones " being no more than a very bland , standard detective show in which , as per any Quinn Martin show , Act I was the murder , Act II was the lead character figuring out the murder , Act III was the plot twist ( another character murdered ) , Act IV was the resolution and the Epilogue was Betty ( Lee Meriwether ) asking her father - in - law Barnaby Jones ( Buddy Ebsen ) how he figured out the crime and then someone saying something witty at the end of the show . < br > < br > One thing I do remember was the late , great composer Jerry Goldsmith ' s excellent theme song . Strangely , the opening credit sequence made me want to see the show off and on for the seven seasons the show was on the air . I will also admit that it was nice to see Ebsen in a role other than Jed Clampett despite Ebsen being badly miscast . I just wished the show was more entertaining than when I first remembered it . < br > < br > Update ( 1 / 11 / 2009 ) : I watched an interview with composer Jerry Goldsmith on YouTube through their Archive of American Television channel . Let ' s just say that I was more kind than Goldsmith about the show " Barnaby Jones ."

| EXPLAINER           | $y_C$ | $y_L$ | EXPLANATION                                                                                                                                                                                             |
|---------------------|-------|-------|---------------------------------------------------------------------------------------------------------------------------------------------------------------------------------------------------------|
| Erasure             | neg   | pos   | wished excellent remembered miscast Strangely                                                                                                                                                           |
| Top- $k$ gradient   | neg   | neg   | miscast excellent remembered it badly                                                                                                                                                                   |
| Top- $k$ softmax    | neg   | pos   | wished excellent remembered miscast figuring                                                                                                                                                            |
| Top- $k$ 1.5-entmax | neg   | neg   | wished remembered Strangely miscast excellent                                                                                                                                                           |
| Top- $k$ sparsemax  | neg   | neg   | Strangely miscast wished badly excellent                                                                                                                                                                |
| Select. entmax15    | neg   | neg   | wished remembered Strangely miscast excellent admit bland no character figuring say badly figured credit , the < the witty want just thing <                                                            |
| Select. sparsemax   | neg   | neg   | Strangely miscast wished badly excellent remembered bland                                                                                                                                               |
| Bernoulli           | neg   | neg   | very bland , lead character plot character Epilogue witty show br late composer excellent theme song Strangely seasons nice badly miscast entertaining remembered br ( 1 / composer American Television |
| HardKuma            | neg   | neg   | bland figuring saying excellent Strangely credit admit miscast wished remembered ( 1 11                                                                                                                 |
| Joint $E$ and $L$   | neg   | neg   | bland badly something                                                                                                                                                                                   |

**(positive)** Yes ... I ' m going with the 1 - 0 on this and here ' s why . In the last few years , I have watched quite a few comedies and only left with a few mild laughs and a couple video rental late fees because the movies were that easy to forget . Then I stumble upon " Nothing " . Looked interesting , wasn ' t expecting much though . I was wrong . This was probably one of the funniest movies I have ever had the chance to watch . Dave and Andrew make a great comedic pair and the humor was catchy enough to remember , but not over complex to the point of missing the joke . I don ' t want to remark on any of the actual scenes , because I do feel this is a movie worth seeing for once . With more and more pointless concepts coming into movies ( you know , like killer military jets and " fresh " remakes that are ruining old classics ) , This movie will make you happy to say it ' s OK to laugh at " Nothing " .

| EXPLAINER           | $y_C$ | $y_L$ | EXPLANATION                                                                                                                                                                                                |
|---------------------|-------|-------|------------------------------------------------------------------------------------------------------------------------------------------------------------------------------------------------------------|
| Erasure             | pos   | pos   | funniest worth great wrong pointless                                                                                                                                                                       |
| Top- $k$ gradient   | pos   | pos   | comedic funniest OK worth joke                                                                                                                                                                             |
| Top- $k$ softmax    | pos   | pos   | funniest worth great wrong pointless                                                                                                                                                                       |
| Top- $k$ 1.5-entmax | pos   | pos   | funniest great wrong worth not                                                                                                                                                                             |
| Top- $k$ sparsemax  | pos   | pos   | funniest worth great catchy wrong                                                                                                                                                                          |
| Select. entmax15    | pos   | neg   | funniest great wrong worth not catchy do probably pointless easy feel ruining movie OK joke ever Yes seeing stumble comedic mild don wasn enough ) , forget because 0 for                                  |
| Select. sparsemax   | pos   | neg   | funniest worth great catchy wrong ruining 0 feel easy OK not pointless                                                                                                                                     |
| Bernoulli           | neg   | neg   | - few comedies few mild laughs couple movies stumble interesting wrong probably funniest movies Dave great comedic humor catchy joke scenes movie pointless movies fresh remakes ruining movie Nothing " . |
| HardKuma            | neg   | neg   | 0 stumble wrong probably one funniest great catchy not joke a movie worth seeing pointless ruining OK Nothing                                                                                              |
| Joint $E$ and $L$   | pos   | neg   | funniest pointless worth                                                                                                                                                                                   |

**(negative)** I ' m not to keen on The Pallbearer , it ' s not too bad , but just very slow at the times . As the movie goes on , it gets a little more interesting , but nothing brilliant . I really like David Schwimmer and I think he ' s good here . I ' m not a massive Gwyneth Paltrow fan , but I don ' t mind her sometimes and she ' s okay here . The Pallbearer is not a highly recommended movie , but if you like the leads then you might enjoy it .

| EXPLAINER           | $y_C$ | $y_L$ | EXPLANATION                                                                                                    |
|---------------------|-------|-------|----------------------------------------------------------------------------------------------------------------|
| Erasure             | neg   | pos   | brilliant slow recommended nothing good                                                                        |
| Top- $k$ gradient   | neg   | pos   | not nothing recommended slow brilliant                                                                         |
| Top- $k$ softmax    | neg   | pos   | brilliant slow nothing recommended good                                                                        |
| Top- $k$ 1.5-entmax | neg   | neg   | slow brilliant nothing not recommended                                                                         |
| Top- $k$ sparsemax  | pos   | pos   | slow brilliant nothing recommended good                                                                        |
| Select. entmax15    | neg   | pos   | slow brilliant nothing not recommended good enjoy highly very if you goes don okay , little it bad gets really |
| Select. sparsemax   | pos   | pos   | slow brilliant nothing recommended good enjoy very bad highly                                                  |
| Bernoulli           | neg   | neg   | Pallbearer , too bad slow times movie , brilliant good massive okay Pallbearer highly movie enjoy              |
| HardKuma            | neg   | pos   | slow nothing brilliant good okay highly recommended might enjoy                                                |
| Joint $E$ and $L$   | neg   | neg   | nothing bad slow okay highly                                                                                   |

Table 21: Examples of extracted explanations for IMDB.

**(positive)** Ok , when I rented this several years ago I had the worst expectations . Yes , the acting isn ' t great , and the picture itself looks dated , but as I sat there , a strange thing happened . I started to like it . The action is great and there are few scenes that make you jump . Brion James , maybe one of the greatest B - grade actors next to Bruce Campbell , is great as always . The story isn ' t bad either . Now I wouldn ' t rush out and buy it , but you won ' t waste your time at least watching this good b - grade post apocalyptic western .

| EXPLAINER           | $y_C$ | $y_L$ | EXPLANATION                                                                                                           |
|---------------------|-------|-------|-----------------------------------------------------------------------------------------------------------------------|
| Erasure             | pos   | pos   | good great great grade waste                                                                                          |
| Top- $k$ gradient   | pos   | neg   | waste worst greatest grade t                                                                                          |
| Top- $k$ softmax    | pos   | neg   | good great great worst grade                                                                                          |
| Top- $k$ 1.5-entmax | pos   | pos   | great waste great good greatest                                                                                       |
| Top- $k$ sparsemax  | pos   | neg   | great waste great good grade                                                                                          |
| Select. entmax15    | pos   | pos   | great waste great good greatest great always Ok apocalyptic Yes make buy t grade isn worst but wouldn strange is      |
| Select. sparsemax   | pos   | neg   | great waste great good grade greatest your worst Yes Ok                                                               |
| Bernoulli           | neg   | neg   | worst , acting , looks strange great scenes greatest actors great story bad , waste watching good apocalyptic western |
| HardKuma            | pos   | neg   | worst great great always waste good apocalyptic                                                                       |
| Joint $E$ and $L$   | pos   | neg   | great worst                                                                                                           |

**(negative)** I have read each and every one of Baroness Orczy ' s Scarlet Pimpernel books . Counting this one , I have seen 3 pimpernel movies . The one with Jane Seymour and Anthony Andrews i preferred greatly to this . It goes out of its way for violence and action , occasionally completely violating the spirit of the book . I don ' t expect movies to stick directly to plots , i gave up being that idealistic long ago , but if an excellent movie of a book has already been made , don ' t remake it with a tv movie that includes excellent actors and nice costumes , but a barely decent script . Sticking with the 80 ' s version .... Rahne

| EXPLAINER           | $y_C$ | $y_L$ | EXPLANATION                                                                                                                                   |
|---------------------|-------|-------|-----------------------------------------------------------------------------------------------------------------------------------------------|
| Erasure             | neg   | pos   | excellent excellent script barely decent                                                                                                      |
| Top- $k$ gradient   | neg   | neg   | barely decent script if but                                                                                                                   |
| Top- $k$ softmax    | neg   | pos   | excellent excellent script decent barely                                                                                                      |
| Top- $k$ 1.5-entmax | neg   | pos   | barely excellent excellent have Sticking                                                                                                      |
| Top- $k$ sparsemax  | neg   | pos   | excellent excellent barely pimpernel decent                                                                                                   |
| Select. entmax15    | neg   | pos   | barely excellent excellent have Sticking preferred decent . It don to t script way if costumes Counting pimpernel Rahne , nice greatly t have |
| Select. sparsemax   | neg   | pos   | excellent excellent barely pimpernel decent preferred nice t Sticking It                                                                      |
| Bernoulli           | pos   | pos   | Baroness Orczy pimpernel movies greatly occasionally movies plots excellent movie tv excellent actors nice costumes barely decent script .... |
| HardKuma            | neg   | pos   | have pimpernel preferred way excellent excellent barely decent Sticking Rahne                                                                 |
| Joint $E$ and $L$   | neg   | neg   | barely expect decent preferred completely                                                                                                     |

**(negative)** While I agree that this was the most horrendous movie ever made , I am proud to say I own a copy simply because myself and a bunch of my friends were extras ( mostly in the dance club scenes , but a few others as well . This movie had potential with Bolo and the director of Enter the Dragon signed on , but as someone who was on set most every day I can tell you that Robert Clouse was an old and confused individual , at least during the making of this movie . It was a wonder he could find his way to the set everyday . I would also like to think that this might have been a better movie if a lot of it had not been destroyed in a fire at Morning Calm studios . I can ' t say that it would have been for sure , but it would be nice to think so . I was actually surprised that it was ever released , and that someone like Bolo would attach his name to it without a fight . Oh well . Also look at the extras for pro wrestler Scott Levy , AKA Raven . He was a wrestler in Portland at the time ... nice guy , very smart .

| EXPLAINER           | $y_C$ | $y_L$ | EXPLANATION                                                                                                                                                               |
|---------------------|-------|-------|---------------------------------------------------------------------------------------------------------------------------------------------------------------------------|
| Erasure             | neg   | pos   | horrendous well well nice nice                                                                                                                                            |
| Top- $k$ gradient   | neg   | pos   | well horrendous this well very                                                                                                                                            |
| Top- $k$ softmax    | neg   | pos   | horrendous well Oh well nice                                                                                                                                              |
| Top- $k$ 1.5-entmax | neg   | neg   | horrendous Oh surprised had agree                                                                                                                                         |
| Top- $k$ sparsemax  | neg   | pos   | horrendous smart nice Oh had                                                                                                                                              |
| Select. entmax15    | neg   | pos   | horrendous Oh surprised had agree nice smart others ever well ever but most nice movie proud like wonder . way few without . find but It making well actually be everyday |
| Select. sparsemax   | neg   | pos   | horrendous smart nice Oh had ever ever few . wonder nice                                                                                                                  |
| Bernoulli           | neg   | pos   | most horrendous bunch extras mostly scenes few This movie old movie everyday lot nice extras wrestler wrestler nice guy                                                   |
| HardKuma            | neg   | neg   | horrendous bunch few confused wonder Oh guy very smart                                                                                                                    |
| Joint $E$ and $L$   | neg   | neg   | horrendous without                                                                                                                                                        |

**(positive)** Having read some of the other comments here I was expecting something truly awful but was pleasantly surprised . REALITY CHECK : The original series wasn ' t that good . I think some people remember it with more affection than it deserved but apart from the car chases and Daisy Duke ' s legs the scripts were weak and poorly acted . The Duke boys were too intelligent and posh for backwood hicks , the shrunken Boss Hog was too cretinous to be evil and Rosco was just hyper throughout every screen moment . It ' s amazing the series actually lasted as long as it did because it ran out of story lines during the first series . < br > Back to the movie . If you watch this film in it ' s own right , not as a direct comparison to however you remember the TV series , then it ' s not bad at all . The real star is of course the General Lee . The car chases and stunts are excellent and that ' s really what D . O . H . is all about . Johnny Knoxville is his usual eccentric self and along with Seann William Scott as Cousin Bo the pair make this film really funny in a hilarious Dumb - And - Dumber sort of way the TV series never achieved . The lovely Jessica Simpson is a natch as Miss Daisy , Burt Reynolds makes a much improved Boss Hog and M . C . Gainey makes a believably nasty Rosco P . Coltrane , the way he always should have been . < br > < br > If you don ' t like slapstick humour and crazy car stunts then you wouldn ' t be watching this film anyway because you should know what to expect . Otherwise if you want an entertaining car - action movie with a few good laughs that ' s not too taxing on the brain then go see this enjoyable romp with an open mind .

| EXPLAINER           | $y_C$ | $y_L$ | EXPLANATION                                                                                                                                                               |
|---------------------|-------|-------|---------------------------------------------------------------------------------------------------------------------------------------------------------------------------|
| Erasure             | pos   | pos   | horrendous well well nice nice                                                                                                                                            |
| Top- $k$ gradient   | pos   | neg   | well horrendous this well very                                                                                                                                            |
| Top- $k$ softmax    | pos   | pos   | horrendous well Oh well nice                                                                                                                                              |
| Top- $k$ 1.5-entmax | pos   | pos   | horrendous Oh surprised had agree                                                                                                                                         |
| Top- $k$ sparsemax  | pos   | neg   | horrendous smart nice Oh had                                                                                                                                              |
| Select. entmax15    | pos   | pos   | horrendous Oh surprised had agree nice smart others ever well ever but most nice movie proud like wonder . way few without . find but It making well actually be everyday |
| Select. sparsemax   | pos   | pos   | horrendous smart nice Oh had ever ever few . wonder nice                                                                                                                  |
| Bernoulli           | pos   | pos   | most horrendous bunch extras mostly scenes few This movie old movie everyday lot nice extras wrestler wrestler nice guy                                                   |
| HardKuma            | neg   | neg   | horrendous bunch few confused wonder Oh guy very smart                                                                                                                    |
| Joint $E$ and $L$   | pos   | pos   | horrendous without                                                                                                                                                        |

Table 22: (continuation) Examples of extracted explanations for IMDB.

| <b>(entailment)</b>                                                                                              |       |       |                                                                                                         |
|------------------------------------------------------------------------------------------------------------------|-------|-------|---------------------------------------------------------------------------------------------------------|
| Premise: Children and adults swim in large pool with red staircase .                                             |       |       |                                                                                                         |
| Hypothesis: A group of people are swimming .                                                                     |       |       |                                                                                                         |
| EXPLAINER                                                                                                        | $y_C$ | $y_L$ | EXPLANATION                                                                                             |
| Erasure                                                                                                          | ent   | ent   | swim pool staircase adults                                                                              |
| Top- $k$ gradient                                                                                                | ent   | con   | adults pool swim large                                                                                  |
| Top- $k$ softmax                                                                                                 | ent   | ent   | swim pool large staircase                                                                               |
| Top- $k$ 1.5-entmax                                                                                              | ent   | ent   | swim pool large staircase                                                                               |
| Top- $k$ sparsemax                                                                                               | ent   | ent   | swim pool large adults                                                                                  |
| Select. entmax15                                                                                                 | ent   | ent   | swim pool large staircase adults Children in and with                                                   |
| Select. sparsemax                                                                                                | ent   | ent   | swim pool large adults in                                                                               |
| Bernoulli                                                                                                        | ent   | ent   | Children and adults swim in large pool with red staircase .                                             |
| HardKuma                                                                                                         | ent   | con   | swim large pool staircase                                                                               |
| Joint $E$ and $L$                                                                                                | ent   | con   | pool swim staircase                                                                                     |
| <b>(contradiction)</b>                                                                                           |       |       |                                                                                                         |
| Premise: A group of Asian children are gathered around in a circle listening to an older male in a white shirt . |       |       |                                                                                                         |
| Hypothesis: A man is wearing a black shirt .                                                                     |       |       |                                                                                                         |
| EXPLAINER                                                                                                        | $y_C$ | $y_L$ | EXPLANATION                                                                                             |
| Erasure                                                                                                          | con   | ent   | Asian white male children                                                                               |
| Top- $k$ gradient                                                                                                | con   | ent   | circle children gathered to                                                                             |
| Top- $k$ softmax                                                                                                 | con   | ent   | Asian white male children                                                                               |
| Top- $k$ 1.5-entmax                                                                                              | con   | con   | white older a male                                                                                      |
| Top- $k$ sparsemax                                                                                               | con   | con   | a male shirt Asian                                                                                      |
| Select. entmax15                                                                                                 | con   | con   | white older a male Asian listening circle shirt of children around gathered a an group in in . A to are |
| Select. sparsemax                                                                                                | con   | con   | a male shirt Asian . an                                                                                 |
| Bernoulli                                                                                                        | ent   | ent   | A group of Asian children are gathered around in a circle listening to an older male in a white shirt . |
| HardKuma                                                                                                         | con   | ent   | group Asian male white shirt                                                                            |
| Joint $E$ and $L$                                                                                                | con   | con   | male group white                                                                                        |
| <b>(contradiction)</b>                                                                                           |       |       |                                                                                                         |
| Premise: A woman is pushing her bike with a baby carriage in front .                                             |       |       |                                                                                                         |
| Hypothesis: A woman is pushing groceries in a cart .                                                             |       |       |                                                                                                         |
| EXPLAINER                                                                                                        | $y_C$ | $y_L$ | EXPLANATION                                                                                             |
| Erasure                                                                                                          | con   | con   | baby woman bike pushing                                                                                 |
| Top- $k$ gradient                                                                                                | con   | con   | carriage bike her with                                                                                  |
| Top- $k$ softmax                                                                                                 | con   | neu   | baby woman carriage pushing                                                                             |
| Top- $k$ 1.5-entmax                                                                                              | con   | con   | carriage woman her baby                                                                                 |
| Top- $k$ sparsemax                                                                                               | ent   | con   | baby carriage woman front                                                                               |
| Select. entmax15                                                                                                 | con   | con   | carriage woman her baby pushing front is A . a bike with                                                |
| Select. sparsemax                                                                                                | ent   | ent   | baby carriage woman front pushing is                                                                    |
| Bernoulli                                                                                                        | con   | con   | A woman is pushing her bike with a baby carriage in front .                                             |
| HardKuma                                                                                                         | con   | con   | woman pushing bike carriage                                                                             |
| Joint $E$ and $L$                                                                                                | con   | con   | woman baby                                                                                              |
| <b>(neutral)</b>                                                                                                 |       |       |                                                                                                         |
| Premise: A woman in a gray shirt working on papers at her desk .                                                 |       |       |                                                                                                         |
| Hypothesis: Lady working in her desk tensely to completed the task                                               |       |       |                                                                                                         |
| EXPLAINER                                                                                                        | $y_C$ | $y_L$ | EXPLANATION                                                                                             |
| Erasure                                                                                                          | neu   | neu   | desk papers woman .                                                                                     |
| Top- $k$ gradient                                                                                                | neu   | neu   | desk on shirt at                                                                                        |
| Top- $k$ softmax                                                                                                 | neu   | neu   | desk papers woman .                                                                                     |
| Top- $k$ 1.5-entmax                                                                                              | neu   | neu   | desk papers working woman                                                                               |
| Top- $k$ sparsemax                                                                                               | neu   | neu   | desk papers woman working                                                                               |
| Select. entmax15                                                                                                 | neu   | ent   | desk papers working woman . on shirt her at in a                                                        |
| Select. sparsemax                                                                                                | neu   | ent   | desk papers woman working her A                                                                         |
| Bernoulli                                                                                                        | neu   | neu   | A woman in a gray shirt working on papers at her desk .                                                 |
| HardKuma                                                                                                         | neu   | neu   | woman working papers at desk                                                                            |
| Joint $E$ and $L$                                                                                                | neu   | neu   | working desk woman papers                                                                               |
| <b>(neutral)</b>                                                                                                 |       |       |                                                                                                         |
| Premise: A brown dog with a blue muzzle is running on green grass .                                              |       |       |                                                                                                         |
| Hypothesis: A mean dog is wearing a muzzle to keep it from attacking cats                                        |       |       |                                                                                                         |
| EXPLAINER                                                                                                        | $y_C$ | $y_L$ | EXPLANATION                                                                                             |
| Erasure                                                                                                          | neu   | neu   | dog brown running muzzle                                                                                |
| Top- $k$ gradient                                                                                                | neu   | neu   | with brown on green                                                                                     |
| Top- $k$ softmax                                                                                                 | neu   | neu   | dog brown running blue                                                                                  |
| Top- $k$ 1.5-entmax                                                                                              | con   | con   | dog blue brown muzzle                                                                                   |
| Top- $k$ sparsemax                                                                                               | neu   | neu   | dog muzzle with is                                                                                      |
| Select. entmax15                                                                                                 | con   | neu   | dog blue brown muzzle running is . A grass green with on a                                              |
| Select. sparsemax                                                                                                | neu   | neu   | dog muzzle with is A a running on brown                                                                 |
| Bernoulli                                                                                                        | neu   | con   | A brown dog with a blue muzzle is running on green grass .                                              |
| HardKuma                                                                                                         | neu   | neu   | dog muzzle running                                                                                      |
| Joint $E$ and $L$                                                                                                | neu   | neu   | dog running muzzle                                                                                      |

Table 23: Examples of extracted explanations for SNLI.

| <b>(contradiction)</b>                                                                                              |       |       |                                                                                                            |
|---------------------------------------------------------------------------------------------------------------------|-------|-------|------------------------------------------------------------------------------------------------------------|
| Premise: A man sits at a table in a room .                                                                          |       |       |                                                                                                            |
| Hypothesis: A woman sits .                                                                                          |       |       |                                                                                                            |
| EXPLAINER                                                                                                           | $y_C$ | $y_L$ | EXPLANATION                                                                                                |
| Erasure                                                                                                             | con   | ent   | sits table . at                                                                                            |
| Top- $k$ gradient                                                                                                   | con   | ent   | . sits table A                                                                                             |
| Top- $k$ softmax                                                                                                    | con   | ent   | sits table . room                                                                                          |
| Top- $k$ 1.5-entmax                                                                                                 | con   | ent   | table . sits man                                                                                           |
| Top- $k$ sparsemax                                                                                                  | con   | ent   | man sits A at                                                                                              |
| Select. entmax15                                                                                                    | con   | ent   | table . sits man A room a a at in                                                                          |
| Select. sparsemax                                                                                                   | con   | ent   | man sits A at in a a                                                                                       |
| Bernoulli                                                                                                           | con   | ent   | A man sits at a table in a room .                                                                          |
| HardKuma                                                                                                            | con   | con   | man sits at                                                                                                |
| Joint $E$ and $L$                                                                                                   | con   | con   | man                                                                                                        |
| Human Highlights                                                                                                    | con   | ent   | man                                                                                                        |
| <b>(entailment)</b>                                                                                                 |       |       |                                                                                                            |
| Premise: Elderly woman climbing up the stairs .                                                                     |       |       |                                                                                                            |
| Hypothesis: The old lady was walking up the stairs .                                                                |       |       |                                                                                                            |
| EXPLAINER                                                                                                           | $y_C$ | $y_L$ | EXPLANATION                                                                                                |
| Erasure                                                                                                             | ent   | ent   | stairs woman Elderly climbing                                                                              |
| Top- $k$ gradient                                                                                                   | ent   | con   | Elderly stairs . the                                                                                       |
| Top- $k$ softmax                                                                                                    | ent   | con   | stairs woman Elderly climbing                                                                              |
| Top- $k$ 1.5-entmax                                                                                                 | ent   | con   | stairs Elderly woman climbing                                                                              |
| Top- $k$ sparsemax                                                                                                  | ent   | con   | stairs Elderly woman climbing                                                                              |
| Select. entmax15                                                                                                    | ent   | con   | stairs Elderly woman climbing up . the                                                                     |
| Select. sparsemax                                                                                                   | ent   | con   | stairs Elderly woman climbing the                                                                          |
| Bernoulli                                                                                                           | con   | con   | Elderly woman climbing up the stairs .                                                                     |
| HardKuma                                                                                                            | ent   | con   | Elderly woman climbing up stairs                                                                           |
| Joint $E$ and $L$                                                                                                   | ent   | ent   | stairs Elderly climbing woman                                                                              |
| Human Highlights                                                                                                    | ent   | con   | Elderly woman climbing                                                                                     |
| <b>(entailment)</b>                                                                                                 |       |       |                                                                                                            |
| Premise: A woman with a blond ponytail and a white hat is riding a white horse , inside a fence with a horned cow . |       |       |                                                                                                            |
| Hypothesis: The woman is riding a horse .                                                                           |       |       |                                                                                                            |
| EXPLAINER                                                                                                           | $y_C$ | $y_L$ | EXPLANATION                                                                                                |
| Erasure                                                                                                             | ent   | con   | horse riding . fence                                                                                       |
| Top- $k$ gradient                                                                                                   | ent   | ent   | cow horse fence riding                                                                                     |
| Top- $k$ softmax                                                                                                    | ent   | ent   | horse riding fence cow                                                                                     |
| Top- $k$ 1.5-entmax                                                                                                 | ent   | con   | horse riding woman a                                                                                       |
| Top- $k$ sparsemax                                                                                                  | ent   | con   | horse riding a is                                                                                          |
| Select. entmax15                                                                                                    | ent   | con   | horse riding woman a cow fence horned a is ponytail , a with inside blond A . hat                          |
| Select. sparsemax                                                                                                   | ent   | con   | horse riding a is with A ,                                                                                 |
| Bernoulli                                                                                                           | ent   | con   | A woman with a blond ponytail and a white hat is riding a white horse , inside a fence with a horned cow . |
| HardKuma                                                                                                            | ent   | con   | woman ponytail riding horse inside horned cow                                                              |
| Joint $E$ and $L$                                                                                                   | ent   | ent   | cow horse fence inside                                                                                     |
| Human Highlights                                                                                                    | ent   | ent   | woman blond horse fence horned cow                                                                         |
| <b>(contradiction)</b>                                                                                              |       |       |                                                                                                            |
| Premise: A woman in a black coat eats dinner while her dog looks on .                                               |       |       |                                                                                                            |
| Hypothesis: A woman is wearing a blue coat .                                                                        |       |       |                                                                                                            |
| EXPLAINER                                                                                                           | $y_C$ | $y_L$ | EXPLANATION                                                                                                |
| Erasure                                                                                                             | con   | ent   | coat black woman dog                                                                                       |
| Top- $k$ gradient                                                                                                   | con   | ent   | dog eats black looks                                                                                       |
| Top- $k$ softmax                                                                                                    | con   | ent   | coat black woman dinner                                                                                    |
| Top- $k$ 1.5-entmax                                                                                                 | con   | con   | black coat woman dog                                                                                       |
| Top- $k$ sparsemax                                                                                                  | con   | con   | black a woman A                                                                                            |
| Select. entmax15                                                                                                    | con   | con   | black coat woman dog a looks in . dinner eats her A on while                                               |
| Select. sparsemax                                                                                                   | con   | ent   | black a woman A coat in her                                                                                |
| Bernoulli                                                                                                           | con   | ent   | A woman in a black coat eats dinner while her dog looks on .                                               |
| HardKuma                                                                                                            | con   | ent   | woman black coat                                                                                           |
| Joint $E$ and $L$                                                                                                   | con   | con   | woman black                                                                                                |
| Human Highlights                                                                                                    | con   | con   | black                                                                                                      |

Table 24: (continuation) Examples of extracted explanations for SNLI.
